# Supplementary material for: Green tea consumption and cause-specific mortality: Results from two prospective cohort studies in China
Source: PubMed Central journal article supplement — J Epidemiol. 2016 Oct 18;27(1):36–41. doi: 10.1016/j.je.2016.08.004 (PMC5328738; doi:10.1016/j.je.2016.08.004), 2016-10-18
Supplement: je-27-036-s001.pdf [file je-27-036-s001.pdf]

**eTable 1.** Sensitivity analysis for all-cause mortality with green tea consumed among never-smokers in SMHS (2002-2012) and SWHS (1997-2012)

| Group                                     | Follow-up years $\geq 2$ years |                 |                  |               |                 |                         | Additional adjustments |                 |                  |               |                |                         | Excluding other tea intakes |                 |                  |               |                |                         |
|-------------------------------------------|--------------------------------|-----------------|------------------|---------------|-----------------|-------------------------|------------------------|-----------------|------------------|---------------|----------------|-------------------------|-----------------------------|-----------------|------------------|---------------|----------------|-------------------------|
|                                           | All participants               |                 |                  | Never smokers |                 |                         | All participants       |                 |                  | Never smokers |                |                         | All participants            |                 |                  | Never smokers |                |                         |
|                                           | Person-years                   | Number of cases | HR (95% CI)      | Person-years  | Number of cases | HR (95% CI)             | Person-years           | Number of cases | HR (95% CI)      | Person-years  | Number of case | HR (95% CI)             | Person-years                | Number of cases | HR (95% CI)      | Person-years  | Number of case | HR (95% CI)             |
| <b>Combined</b>                           |                                |                 |                  |               |                 |                         |                        |                 |                  |               |                |                         |                             |                 |                  |               |                |                         |
| Drinking green tea regularly              |                                |                 |                  |               |                 |                         |                        |                 |                  |               |                |                         |                             |                 |                  |               |                |                         |
| No                                        | 791,329                        | 3,701           | 1.00             | 696,862       | 3,053           | 1.00                    | 791,744                | 4,054           | 1.00             | 697,159       | 3,310          | 1.00                    | 765,553                     | 3,888           | 1.00             | 678,373       | 3,226          | 1.00                    |
| Yes                                       | 533,010                        | 2,202           | 0.97 (0.91-1.03) | 299,911       | 895             | <b>0.92 (0.85-1.00)</b> | 533,316                | 2,463           | 0.96 (0.90-1.01) | 299,981       | 957            | <b>0.90 (0.83-0.97)</b> | 513,125                     | 2,371           | 0.96 (0.91-1.02) | 285,092       | 919            | <b>0.90 (0.83-0.98)</b> |
| Amount of green tea consumed <sup>a</sup> |                                |                 |                  |               |                 |                         |                        |                 |                  |               |                |                         |                             |                 |                  |               |                |                         |
| Never                                     | 791,329                        | 3,701           | 1.00             | 696,862       | 3,053           | 1.00                    | 791,744                | 4,054           | 1.00             | 697,159       | 3,310          | 1.00                    | 765,553                     | 3,888           | 1.00             | 678,373       | 3,226          | 1.00                    |
| 0-<Median                                 | 177,111                        | 728             | 0.91 (0.83-0.99) | 106,921       | 328             | 0.84 (0.74-0.94)        | 177,213                | 820             | 0.91 (0.83-0.98) | 106,953       | 360            | 0.84 (0.75-0.94)        | 162,230                     | 746             | 0.89 (0.82-0.98) | 95,670        | 331            | 0.84 (0.75-0.95)        |
| $\geq$ Median                             | 355,898                        | 1,474           | 1.00 (0.93-1.06) | 192,989       | 567             | 0.96 (0.88-1.05)        | 356,103                | 1,643           | 0.98 (0.92-1.05) | 193,027       | 597            | 0.95 (0.87-1.03)        | 350,895                     | 1,625           | 1.00 (0.93-1.06) | 189,421       | 588            | 0.94 (0.85-1.03)        |
| Test for trend                            |                                |                 | 0.758            |               |                 | <b>0.142</b>            |                        |                 | 0.337            |               |                | <b>0.074</b>            |                             |                 | 0.704            |               |                | <b>0.056</b>            |
| Years of green tea consumed <sup>b</sup>  |                                |                 |                  |               |                 |                         |                        |                 |                  |               |                |                         |                             |                 |                  |               |                |                         |
| Never                                     | 791,329                        | 3,701           | 1.00             | 696,862       | 3,053           | 1.00                    | 791,744                | 4,054           | 1.00             | 697,159       | 3,310          | 1.00                    | 765,553                     | 3,888           | 1.00             | 678,373       | 3,226          | 1.00                    |
| 0-<Median                                 | 212,634                        | 814             | 1.07 (0.98-1.16) | 104,088       | 270             | 1.01 (0.89-1.15)        | 212,748                | 910             | 1.04 (0.96-1.13) | 104,114       | 290            | 1.00 (0.87-1.13)        | 204,473                     | 870             | 1.06 (0.97-1.15) | 98,399        | 277            | 1.01 (0.89-1.14)        |
| $\geq$ Median                             | 320,310                        | 1,388           | 0.92 (0.86-0.99) | 195,785       | 625             | 0.88 (0.81-0.96)        | 320,503                | 1,553           | 0.92 (0.86-0.98) | 195,829       | 667            | 0.87 (0.79-0.94)        | 308,587                     | 1,501           | 0.92 (0.86-0.98) | 186,655       | 642            | 0.86 (0.79-0.94)        |
| Test for trend                            |                                |                 | 0.057            |               |                 | <b>0.005</b>            |                        |                 | 0.027            |               |                | <b>0.003</b>            |                             |                 | 0.029            |               |                | <b>0.001</b>            |
| <b>Men</b>                                |                                |                 |                  |               |                 |                         |                        |                 |                  |               |                |                         |                             |                 |                  |               |                |                         |
| Drinking green tea regularly              |                                |                 |                  |               |                 |                         |                        |                 |                  |               |                |                         |                             |                 |                  |               |                |                         |
| No                                        | 148,518                        | 880             | 1.00             | 66,886        | 403             | 1.00                    | 148,699                | 1,035           | 1.00             | 66,960        | 472            | 1.00                    | 140,009                     | 950             | 1.00             | 64,949        | 453            | 1.00                    |
| Yes                                       | 284,545                        | 1,476           | 0.97 (0.89-1.06) | 60,131        | 257             | <b>0.84 (0.71-0.98)</b> | 284,816                | 1,706           | 0.96 (0.88-1.04) | 60,171        | 292            | <b>0.82 (0.70-0.95)</b> | 278,347                     | 1,648           | 0.97 (0.89-1.05) | 58,539        | 283            | <b>0.83 (0.71-0.96)</b> |
| Amount of green tea consumed <sup>a</sup> |                                |                 |                  |               |                 |                         |                        |                 |                  |               |                |                         |                             |                 |                  |               |                |                         |
| Never                                     | 148,518                        | 880             | 1.00             | 66,886        | 403             | 1.00                    | 148,699                | 1,035           | 1.00             | 66,960        | 472            | 1.00                    | 140,009                     | 950             | 1.00             | 64,949        | 453            | 1.00                    |
| 0-<Median                                 | 102,058                        | 537             | 0.94 (0.84-1.05) | 33,309        | 151             | 0.83 (0.69-1.01)        | 102,153                | 620             | 0.94 (0.85-1.04) | 33,334        | 174            | 0.83 (0.70-0.99)        | 97,411                      | 572             | 0.93 (0.83-1.03) | 32,009        | 167            | 0.84 (0.70-1.00)        |
| $\geq$ Median                             | 182,487                        | 939             | 0.99 (0.90-1.09) | 26,821        | 106             | 0.84 (0.68-1.05)        | 182,663                | 1,086           | 0.97 (0.89-1.07) | 26,837        | 118            | 0.8 (0.65-0.99)         | 180,936                     | 1,076           | 1 (0.91-1.10)    | 26,530        | 116            | 0.81 (0.66-1.00)        |
| Test for trend                            |                                |                 | 0.868            |               |                 | <b>0.056</b>            |                        |                 | 0.542            |               |                | <b>0.014</b>            |                             |                 | 0.966            |               |                | <b>0.022</b>            |
| Years of green tea consumed <sup>b</sup>  |                                |                 |                  |               |                 |                         |                        |                 |                  |               |                |                         |                             |                 |                  |               |                |                         |
| Never                                     | 148,518                        | 880             | 1.00             | 66,886        | 403             | 1.00                    | 148,699                | 1,035           | 1.00             | 66,960        | 472            | 1.00                    | 140,009                     | 950             | 1.00             | 64,949        | 453            | 1.00                    |
| 0-<Median                                 | 123,453                        | 575             | 1.07 (0.96-1.20) | 18,523        | 65              | 0.88 (0.68-1.16)        | 123,553                | 660             | 1.04 (0.94-1.15) | 18,537        | 76             | 0.89 (0.70-1.15)        | 120,626                     | 630             | 1.05 (0.94-1.17) | 17,948        | 71             | 0.88 (0.68-1.13)        |
| $\geq$ Median                             | 161,042                        | 901             | 0.92 (0.84-1.02) | 41,586        | 192             | 0.82 (0.69-0.98)        | 161,214                | 1,046           | 0.92 (0.84-1.01) | 41,613        | 216            | 0.8 (0.67-0.94)         | 157,672                     | 1,018           | 0.93 (0.85-1.02) | 40,569        | 212            | 0.81 (0.69-0.96)        |
| Test for trend                            |                                |                 | 0.073            |               |                 | <b>0.027</b>            |                        |                 | 0.051            |               |                | <b>0.007</b>            |                             |                 | 0.093            |               |                | <b>0.013</b>            |
| <b>Women</b>                              |                                |                 |                  |               |                 |                         |                        |                 |                  |               |                |                         |                             |                 |                  |               |                |                         |
| Drinking green tea regularly              |                                |                 |                  |               |                 |                         |                        |                 |                  |               |                |                         |                             |                 |                  |               |                |                         |

|                                           |                |         |       |                         |         |       |                         |         |       |                         |         |       |                         |         |       |                         |         |              |                         |
|-------------------------------------------|----------------|---------|-------|-------------------------|---------|-------|-------------------------|---------|-------|-------------------------|---------|-------|-------------------------|---------|-------|-------------------------|---------|--------------|-------------------------|
|                                           | No             | 642,811 | 2,821 | 1.00                    | 629,976 | 2,650 | 1.00                    | 643,045 | 3,019 | 1.00                    | 630,199 | 2,838 | 1.00                    | 625,544 | 2,938 | 1.00                    | 613,424 | 2,773        | 1.00                    |
|                                           | Yes            | 248,465 | 726   | 0.96 (0.88-1.04)        | 239,780 | 638   | 0.95 (0.86-1.03)        | 248,500 | 757   | <b>0.95 (0.87-1.03)</b> | 239,810 | 665   | <b>0.93 (0.85-1.02)</b> | 234,778 | 723   | <b>0.95 (0.87-1.03)</b> | 226,553 | 636          | <b>0.93 (0.85-1.02)</b> |
| Amount of green tea consumed <sup>a</sup> |                |         |       |                         |         |       |                         |         |       |                         |         |       |                         |         |       |                         |         |              |                         |
|                                           | Never          | 642,811 | 2,821 | 1.00                    | 629,976 | 2,650 | 1.00                    | 643,045 | 3,019 | 1.00                    | 630,199 | 2,838 | 1.00                    | 625,544 | 2,938 | 1.00                    | 613,424 | 2,773        | 1.00                    |
|                                           | 0-<Median      | 75,053  | 191   | 0.85 (0.73-0.98)        | 73,612  | 177   | 0.84 (0.72-0.98)        | 75,060  | 200   | 0.84 (0.73-0.97)        | 73,619  | 186   | 0.84 (0.72-0.97)        | 64,819  | 174   | 0.83 (0.72-0.97)        | 63,661  | 164          | 0.84 (0.71-0.98)        |
|                                           | ≥Median        | 173,411 | 535   | 1.00 (0.91-1.10)        | 166,168 | 461   | 0.99 (0.90-1.10)        | 173,440 | 557   | 0.99 (0.91-1.09)        | 166,190 | 479   | 0.98 (0.89-1.08)        | 169,959 | 549   | 0.99 (0.90-1.09)        | 162,891 | 472          | 0.97 (0.87-1.07)        |
|                                           | Test for trend |         |       | 0.714                   |         |       | 0.523                   |         |       | 0.548                   |         |       | <b>0.349</b>            |         | 0.517 |                         |         | <b>0.272</b> |                         |
| Years of green tea consumed <sup>b</sup>  |                |         |       |                         |         |       |                         |         |       |                         |         |       |                         |         |       |                         |         |              |                         |
|                                           | Never          | 642,811 | 2,821 | 1.00                    | 629,976 | 2,650 | 1.00                    | 643,045 | 3,019 | 1.00                    | 630,199 | 2,838 | 1.00                    | 625,544 | 2,938 | 1.00                    | 613,424 | 2,773        | 1.00                    |
|                                           | 0-<Median      | 89,181  | 239   | 1.06 (0.93-1.21)        | 85,565  | 205   | 1.05 (0.91-1.22)        | 89,195  | 250   | 1.05 (0.92-1.20)        | 85,577  | 214   | 1.04 (0.90-1.20)        | 83,847  | 240   | 1.07 (0.93-1.22)        | 80,451  | 206          | 1.05 (0.91-1.21)        |
|                                           | ≥Median        | 159,268 | 487   | <b>0.92 (0.83-1.01)</b> | 154,199 | 433   | <b>0.90 (0.82-1.00)</b> | 159,289 | 507   | <b>0.91 (0.82-1.00)</b> | 154,216 | 451   | <b>0.89 (0.81-0.99)</b> | 150,915 | 483   | <b>0.9 (0.82-0.99)</b>  | 146,086 | 430          | <b>0.88 (0.80-0.98)</b> |
|                                           | Test for trend |         |       | 0.137                   |         |       | 0.093                   |         |       | 0.075                   |         |       | <b>0.045</b>            |         | 0.069 |                         |         | <b>0.034</b> |                         |

CI, confidence interval; HR, hazard ratio; Q, quintiles; SMHS, Shanghai Men's Health Study; SWHS, Shanghai Women's Health Study.

<sup>a</sup> For SMHS, Median =8.22 g/day; For SWHS, Median=3.29 g/day

<sup>b</sup> For SMHS, Median=25 years; For SWHS, Median=30 years

<sup>c</sup> Additionally adjusted for dietary factors: intake of vegetables (quartiles), fruit (quartiles), fish (quartiles), red meat (quartiles), rice (quartiles), and fiber (quartiles)

<sup>d</sup> Excluding black tea, oolong tea, and herbal tea intakers
